# Supplementary material for: PARP inhibitors affect growth, survival and radiation susceptibility of human alveolar and embryonal rhabdomyosarcoma cell lines
Source: PubMed Central journal article supplement (PMC6326011; doi:10.1007/s00432-018-2774-6), 2018-10-24

**a** **$\gamma$ H2AX**

■ 0 Gy ■ 4 Gy

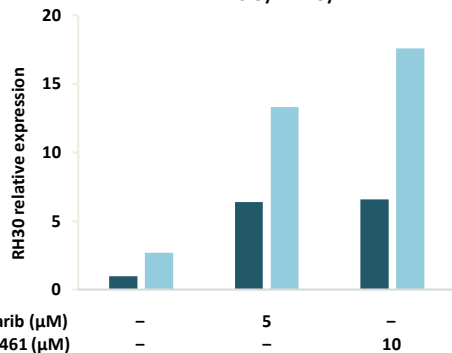**RAD51**

■ 0 Gy ■ 4 Gy

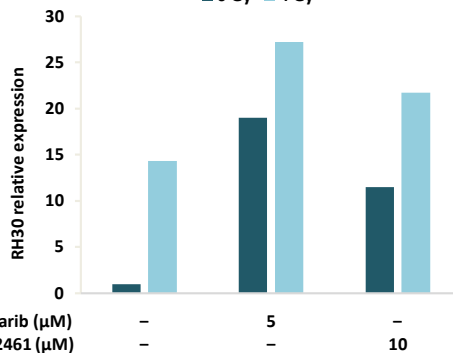**b** **$\gamma$ H2AX**

■ 0 Gy ■ 4 Gy

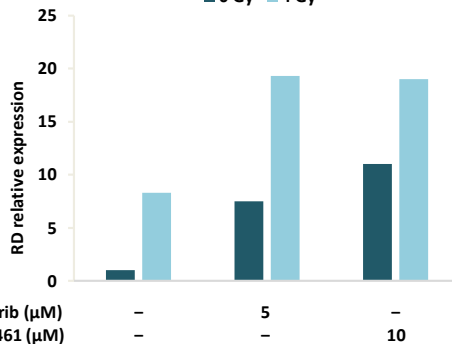**RAD51**

■ 0 Gy ■ 4 Gy

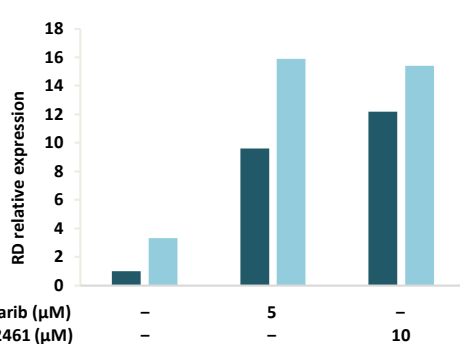

Supplement: 432_2018_2774_MOESM1_ESM.pdf [file 432_2018_2774_MOESM1_ESM.pdf]
