# Supplementary material for: PARP inhibitors affect growth, survival and radiation susceptibility of human alveolar and embryonal rhabdomyosarcoma cell lines
Source: PubMed Central journal article supplement (PMC6326011; doi:10.1007/s00432-018-2774-6), 2018-10-24
Supplement: 432_2018_2774_MOESM2_ESM.pdf [file 432_2018_2774_MOESM2_ESM.pdf]

**a**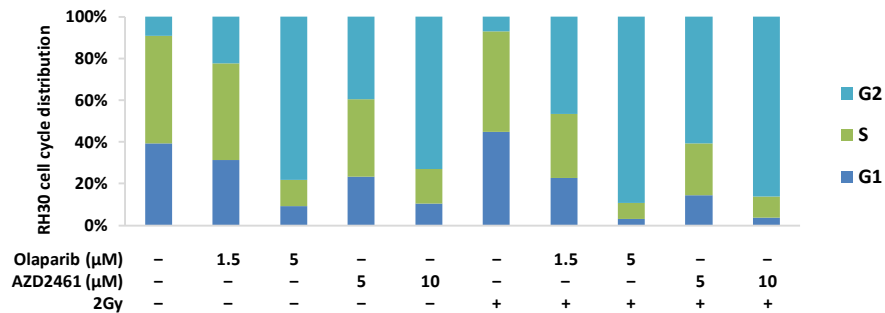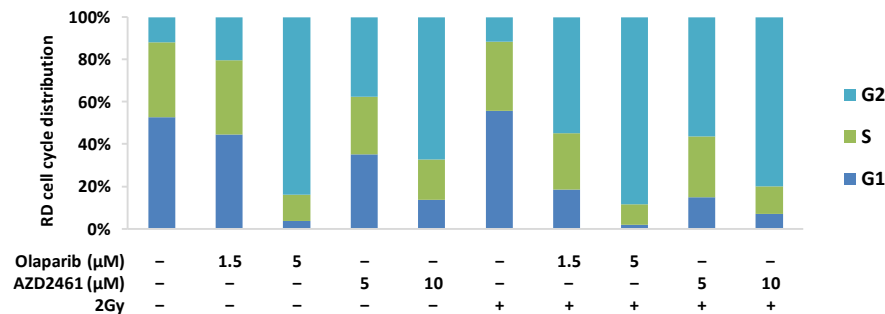**b**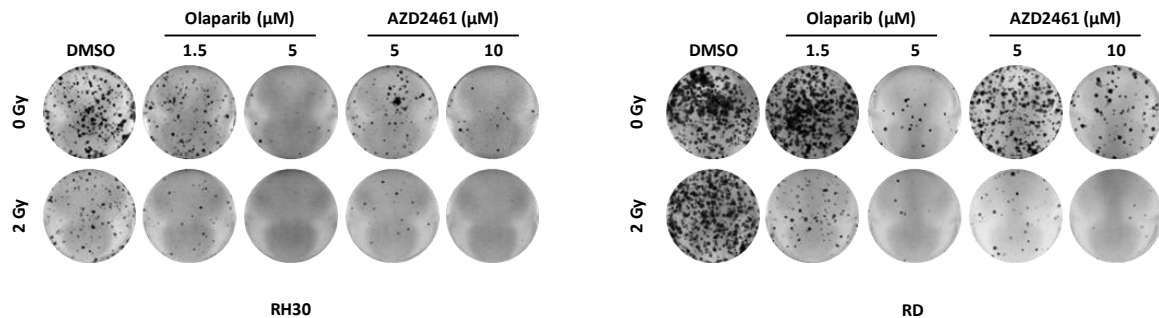

Article title: PARP inhibitors affect growth, survival and radiation susceptibility of human alveolar and embryonal rhabdomyosarcoma cell lines.

Journal name: Journal of Cancer Research and Clinical Oncology.

Author names: Simona Camero, Simona Ceccarelli, Francesca De Felice, Francesco Marampon, Olga Mannarino, Lucrezia Camicia, Enrica Vescarelli, Paola Pontecorvi, Barry Pizer, Rajeev Shukla, Amalia Schiavetti, Maria Giovanna Mollace, Antonio Pizzuti, Vincenzo Tombolini, Cinzia Marchese, Francesca Megiorni and Carlo Dominici. Simona Camero, Simona Ceccarelli, Francesca De Felice, Francesco Marampon, Olga Mannarino, Enrica Vescarelli, Paola Pontecorvi, Barry Pizer, Rajeev Shukla, Amalia Schiavetti, Maria Giovanna Mollace, Antonio Pizzuti, Vincenzo Tombolini, Cinzia Marchese, Francesca Megiorni and Carlo Dominici.

Corresponding author: Francesca Megiorni, PhD - Department of Paediatrics, “Sapienza” University of Rome. Viale Regina Elena 324

00161 Rome, Italy. E-mail: francesca.megiorni@uniroma1.it
